# Supplementary material for: Pseudo-Temporal Analysis of Single-Cell RNA Sequencing Reveals Trans-Differentiation Potential of Greater Epithelial Ridge Cells Into Hair Cells During Postnatal Development of Cochlea in Rats
Source: Front Mol Neurosci. 2022 Mar 16;15:832813. doi: 10.3389/fnmol.2022.832813 (PMC8966675; doi:10.3389/fnmol.2022.832813)
Supplement: Supplementary file 6 [file Table_6.XLSX]

## Sheet: Sheet1
pathway_id	pathway_name	Genes	S gene number	TS gene number	B gene number	TB gene number	pvalue
ko04932	Non-alcoholic fatty liver disease (NAFLD)	Uqcr11;Uqcrq;Ndufs2;Ndufa9;Cox8a;Sdhc;Ndufv3.1;Cox6c;Ndufb9;Cox6a1;Ndufab1;Mt-co2;Ndufb7;Gsk3a;Ndufv1;Ndufa5;Ndufb8;Ndufb5;Ndufc2;Ndufs3;Ndufb10;Cox7c;Uqcrfs1;Mt-co3;Cox6b1;Sdhb;Cyc1;Cox5b;Cox7a2l2;Ndufa4;Ndufb6;Mt-co1;Uqcrc2;Gsk3b;Cox5a;Uqcr10;LOC100363502;Ndufs7;Ndufv2;Uqcrb.1;Ndufb2;Uqcrh;Ndufs5;Ndufa8;Ndufa12;Ndufa6;Uqcrc1;Cox4i1;Cox7b;LOC108348144;Ndufb3;Mapk10	52	450	149	6625	0
ko04714	Thermogenesis	Uqcr11;LOC100361457;Uqcrq;Atp5mg;Ndufs2;Mt-nd6;Ndufa9;Actg1;Cox8a;Atp5me;Acsl6;Sdhc;Atp5f1c;Atp5mc3;Atp5mf;Ndufv3.1;Cox6c;Ndufb9;Cox6a1;Ndufab1;Mt-co2;Ndufb7;Mt-nd2;Ndufv1;Ndufa5;Ndufb8;Ndufb5;Atp5po;Actb;Smarcd3;Ndufc2;Ndufs3;Ndufb10;Cox7c;Atp5pd;Uqcrfs1;Mt-co3;Cox6b1;Actl6b;Cnr1;Sdhb;Cyc1;Cox5b;Cox7a2l2;Ndufa4;Ndufb6;Mt-co1;Ndufaf5;Uqcrc2;Smarcd1;Atp5f1a;Cox5a;Atp5f1d;Uqcr10;Atp5f1e;Ndufs7;Mt-n…	81	450	231	6625	0
ko05010	Alzheimer disease	Uqcr11;Uqcrq;Ndufs2;Ndufa9;Capn2;Cox8a;Rtn3;Sdhc;Atp5f1c;Atp5mc3;Ndufv3.1;Cox6c;Ndufb9;Cox6a1;Ndufab1;Mt-co2;Ndufb7;Apbb1;Ndufv1;Ndufa5;Ndufb8;Ndufb5;LOC108351137.1;Atp5po;Ndufc2;Ndufs3;Ndufb10;Cox7c;Atp5pd;Grin1;Uqcrfs1;Mt-co3;Cox6b1;Sdhb;Cyc1;Cox5b;Cox7a2l2;Ndufa4;Ndufb6;Mt-co1;Uqcrc2;Calm2;Atp5f1a;Gsk3b;Cox5a;Atp5f1d;Uqcr10;LOC100363502;Atp5f1e;Ndufs7;LOC108351137;Ndufv2;Mapt;Atp2a2;Uqcrb.1;At…	74	450	174	6625	0
ko00190	Oxidative phosphorylation	Atp6ap1;Uqcr11;Uqcrq;Atp5mg;Ndufs2;Mt-nd6;Ndufa9;Atp6v1b2;Cox8a;Atp5me;Sdhc;Atp5f1c;Atp5mc3;Atp5mf;Ndufv3.1;Cox6c;Ndufb9;Cox6a1;Ndufab1;Mt-co2;Ndufb7;Mt-nd2;Atp6v1d;Ndufv1;Ndufa5;Ndufb8;Ndufb5;Atp5po;Ndufc2;Ndufs3;Ndufb10;Cox7c;Atp5pd;Uqcrfs1;Mt-co3;Cox6b1;Sdhb;Cyc1;Cox5b;Cox7a2l2;Ndufa4;Ndufb6;Mt-co1;Uqcrc2;Atp5f1a;Atp6v1f;Cox5a;Atp6v1a;Atp5f1d;Uqcr10;Atp5f1e;Atp6v1e1;Atp6v0c;Ndufs7;Mt-nd3;Ndufv…	76	450	135	6625	1.05285e-54
ko05012	Parkinson disease	Uqcr11;Uchl1;Uqcrq;Vdac3;Ndufs2;Mt-nd6;Ndufa9;Cox8a;Sdhc;Atp5f1c;Atp5mc3;Ndufv3.1;Cox6c;Ndufb9;Cox6a1;Ndufab1;Mt-co2;Ndufb7;Mt-nd2;Ndufv1;Ndufa5;Slc25a4;Ndufb8;Ndufb5;Atp5po;Ndufc2;Ndufs3;Ndufb10;Cox7c;Sept5;Atp5pd;Uqcrfs1;Mt-co3;Cox6b1;Sdhb;Cyc1;Cox5b;Cox7a2l2;Ndufa4;Ndufb6;Mt-co1;Uqcrc2;Atp5f1a;Cox5a;Atp5f1d;Uqcr10;LOC100363502;Atp5f1e;Ndufs7;Mt-nd3;Ndufv2;Uqcrb.1;Atp5pf;Ndufb2;Uqcrh;Ndufs5;Vda…	74	450	144	6625	2.24608e-49
ko05016	Huntington disease	Uqcr11;Uqcrq;Vdac3;Ndufs2;Ndufa9;Cox8a;Sdhc;Atp5f1c;Atp5mc3;Ndufv3.1;Cox6c;Ndufb9;Cox6a1;Ndufab1;Mt-co2;Ndufb7;Hip1;Ndufv1;Ndufa5;Slc25a4;Ndufb8;Ndufb5;Cltb;Atp5po;Ndufc2;Ndufs3;Ndufb10;Cox7c;Atp5pd;Grin1;Uqcrfs1;Mt-co3;Cox6b1;Sdhb;Cyc1;Cox5b;Cox7a2l2;Ndufa4;Ndufb6;Mt-co1;Uqcrc2;Atp5f1a;Cox5a;Atp5f1d;Uqcr10;LOC100363502;Cltc;Atp5f1e;Ap2m1;Ndufs7;Ndufv2;Polr2k;Uqcrb.1;Atp5pf;Ndufb2;Uqcrh;Ndufs5;Vd…	73	450	187	6625	3.33067e-16
ko04260	Cardiac muscle contraction	Cacnb4;Uqcr11;Uqcrq;Cox8a;Cox6c;Cox6a1;Mt-co2;Cox7c;Cacna2d1;Atp1b1;Uqcrfs1;Mt-co3;Cox6b1;Cyc1;Cox5b;Cox7a2l2;Mt-co1;Uqcrc2;Cox5a;Cacng2;Uqcr10;Atp2a2;Uqcrb.1;Cacna2d3;Uqcrh;Cacnb3;Atp1a3;Uqcrc1;Cox4i1;Cox7b	30	450	76	6625	3.33067e-16
ko04723	Retrograde endocannabinoid signaling	Ndufs2;Mt-nd6;Ndufa9;Slc17a6;Ndufv3.1;Ndufb9;Ndufab1;Gng3;Ndufb7;Mt-nd2;Ndufv1;Ndufa5;Ndufb8;Ndufb5;Ndufc2;Ndufs3;Ndufb10;Gnao1;Slc17a7;Gria2;Cnr1;Ndufa4;Ndufb6;Gng2;Ndufs7;Mt-nd3;Ndufv2;Ndufb2;Ndufs5;Ndufa8;Mt-nd4;Ndufa12;Ndufa6;Rims1;LOC108348144;Mt-nd1;Ndufb3;Mapk10	38	450	148	6625	2.71116e-13
ko04721	Synaptic vesicle cycle	Rab3a;Cplx1;Atp6v1b2;Cplx2;Slc17a6;Atp6v1d;Dnm1;Stx1b;Cltb;Napa;Slc17a7;Atp6v1f;Atp6v1a;Syt1;Cltc;Ap2m1;Nsf;Atp6v1e1;Atp6v0c;Dnm3;Stxbp1;Vamp2;Atp6v0a1;Rims1;Atp6v1g2	25	450	75	6625	7.19436e-12
ko00020	Citrate cycle (TCA cycle)	Sdhc;Aco2;Dlst;Pdhb;Sdhb;Idh3a;Acly;Idh3g;Pdha1;Mdh2;Mdh1;Dld	12	450	31	6625	3.58689e-07
ko00010	Glycolysis / Gluconeogenesis	Pgk1;LOC108351137.1;Ldhb;Pdhb;Aldh1a3;Aldoc;Gpi;Pfkm;Pdha1;Pgam1;LOC108351137;Aldoa;Akr1a1;Acss2;Eno1;Dld	16	450	63	6625	2.94015e-06
ko04145	Phagosome	Atp6ap1;Tubb5;LOC100361457;Dync1h1;Atp6v1b2;Actg1;Tubb3;Tubb4b;Dync1i2;Atp6v1d;Actb;Dync1li2;Dync1i1;Tuba1b;Tubb4a;Atp6v1f;Atp6v1a;Tubb2a;Atp6v1e1;Atp6v0c;Tfrc;Tuba1a;Tuba4a;Dync1li1;Tubb2b;Stx7;Atp6v0a1;Atp6v1g2	28	450	162	6625	3.41082e-06
ko04966	Collecting duct acid secretion	Slc12a7;Atp6v1b2;Atp6v1d;Atp6v1f;Atp6v1a;Atp6v1e1;Atp6v0c;Atp6v0a1;Atp6v1g2	9	450	27	6625	4.41774e-05
ko00620	Pyruvate metabolism	Ldhb;Pdhb;Pdha1;Hagh;Mdh2;Acss2;Mdh1;Dld;Acyp1;Acat1	10	450	38	6625	0.000158609
ko04720	Long-term potentiation	Ppp1r1a;Grin1;Gria2;Calm2;Camk2b;Camk4;Calm1;Hras;Kras;Camk2g;Ppp3cb;Rps6ka3;Calm2.1	13	450	63	6625	0.00025036
ko04962	Vasopressin-regulated water reabsorption	Dync1h1;Dync1i2;Dynll2;Dync1li2;Dync1i1;Nsf;Dync1li1;Vamp2;Dctn1;Dctn6	10	450	41	6625	0.000312788
ko04728	Dopaminergic synapse	Caly;Ppp2r1a;Gng3;Gsk3a;Gnao1;Kif5a;Scn1a;Gria2;Calm2;Gsk3b;Ppp2r5b;Camk2b;Gng2;Ppp2r2b;Kif5c;Calm1;Camk2g;Ppp3cb;Calm2.1;Mapk10	20	450	128	6625	0.000355143
ko04261	Adrenergic signaling in cardiomyocytes	Cacnb4;Ppp2r1a;Ppp1r1a;Atp2b2;Cacna2d1;Atp1b1;Scn1b;Calm2;Ppp2r5b;Cacng2;Camk2b;Ppp2r2b;Atp2a2;Cacna2d3;Atp2b1;Calm1;Cacnb3;Atp1a3;Camk2g;Calm2.1	20	450	140	6625	0.00114689
ko05132	Salmonella infection	LOC100361457;Klc1;Dync1h1;Wasf1;Actg1;Dync1i2;LOC100909840;Actb;Dync1li2;Dync1i1;Dync1li1;Klc2;Mapk10	13	450	77	6625	0.00183775
ko04114	Oocyte meiosis	Ywhaq;Ppp2r1a;Skp1;Calm2;Ppp2r5b;Ywhab;Camk2b;Ywhah;Ywhag;Ywhaz;Calm1;Camk2g;Ppp3cb;Ywhae;Rps6ka3;Calm2.1	16	450	109	6625	0.00263147
ko04921	Oxytocin signaling pathway	Cacnb4;LOC100361457;Actg1;Actb;Gnao1;Cacna2d1;Calm2;Cacng2;Camk2b;Camk4;Cacna2d3;Calm1;Cacnb3;Hras;Kras;Eef2;Camk2g;Ppp3cb;Calm2.1;Rcan1	20	450	150	6625	0.00267401
ko04722	Neurotrophin signaling pathway	Kidins220;Ngfr;Calm2;Gsk3b;Camk2b;Bex3;Ntrk2;Camk4;Calm1;Hras;Kras;Camk2g;Ywhae;Rps6ka3;Calm2.1;Ntrk3;Mapk10	17	450	120	6625	0.00288155
ko04961	Endocrine and other factor-regulated calcium reabsorption	Dnm1;Cltb;Atp1b1;Calb1;Cltc;Ap2m1;Dnm3;Atp2b1;Atp1a3	9	450	46	6625	0.00326975
ko03050	Proteasome	Psmb7;Psmc6;Psmb5;Psmd2;Psmd1;Psmb6;Psmc5;Psmc1;Psmd12	9	450	46	6625	0.00326975
ko04216	Ferroptosis	Vdac3;Map1lc3b;Acsl6;Map1lc3a;Fth1;Tfrc;Acsl4;Vdac2	8	450	39	6625	0.00402975
ko05014	Amyotrophic lateral sclerosis (ALS)	Nefl;Grin1;Gria2;Nefh;LOC100363502;Nefm;Prph;Ppp3cb;Sod1	9	450	53	6625	0.00863007
ko00630	Glyoxylate and dicarboxylate metabolism	Aco2;Mdh2;Acss2;Mdh1;Dld;Acat1	6	450	28	6625	0.00991954
ko00900	Terpenoid backbone biosynthesis	Idi1;Hmgcs1;Pmvk;Fdps;Acat1	5	450	21	6625	0.0115939
ko00072	Synthesis and degradation of ketone bodies	Oxct1;Hmgcs1;Acat1	3	450	9	6625	0.0192084
ko05412	Arrhythmogenic right ventricular cardiomyopathy (ARVC)	Cacnb4;LOC100361457;Actg1;Actb;Cdh2;Cacna2d1;Cacng2;Atp2a2;Cacna2d3;Cacnb3	10	450	71	6625	0.0207938
ko05031	Amphetamine addiction	Grin1;Gria2;Calm2;Camk2b;Camk4;Calm1;Camk2g;Ppp3cb;Calm2.1	9	450	64	6625	0.0278146
ko04540	Gap junction	Tubb5;Tubb3;Tubb4b;Tuba1b;Tubb4a;Tubb2a;Tuba1a;Tuba4a;Tubb2b;Hras;Kras	11	450	87	6625	0.0325775
ko00030	Pentose phosphate pathway	Prps1;Aldoc;Gpi;Pfkm;Aldoa	5	450	28	6625	0.0379279
ko04925	Aldosterone synthesis and secretion	Atp2b2;Atp1b1;Calm2;Camk2b;Camk4;Atp2b1;Calm1;Atp1a3;Camk2g;Cacna1h;Calm2.1	11	450	91	6625	0.0432798
ko04020	Calcium signaling pathway	Vdac3;Slc25a4;Atp2b2;Grin1;P2rx3;Calm2;Camk2b;Camk4;Atp2a2;Atp2b1;Calm1;Vdac1;Camk2g;Ppp3cb;Vdac2;Cacna1h;Calm2.1;Slc25a5	18	450	175	6625	0.0499037
ko04360	Axon guidance	Pak1;Cfl2;Sema3e;Epha5;Epha4;Gsk3b;Pak3;Camk2b;Robo2;Srgap3;L1cam;Hras;Kras;Camk2g;Ppp3cb;Prkcz;Dpysl5;Rgma	18	450	178	6625	0.0571813
ko04713	Circadian entrainment	Gng3;Gnao1;Grin1;Gria2;Calm2;Camk2b;Gng2;Calm1;Camk2g;Cacna1h;Calm2.1	11	450	96	6625	0.0597739
ko05323	Rheumatoid arthritis	Atp6ap1;Atp6v1b2;Atp6v1d;Atp6v1f;Atp6v1a;Atp6v1e1;Atp6v0c;Atp6v0a1;Atp6v1g2	9	450	74	6625	0.0618545
ko05100	Bacterial invasion of epithelial cells	LOC100361457;Wasf1;Actg1;Dnm1;Cltb;Actb;Sept6;Cltc;Dnm3	9	450	75	6625	0.0662845
ko00970	Aminoacyl-tRNA biosynthesis	Sars;Eprs;Gars;Nars;Vars;Lars	6	450	44	6625	0.0749897
ko04390	Hippo signaling pathway	LOC100361457;Ywhaq;Ppp2r1a;Actg1;Actb;Apc;Gsk3b;Ywhab;Apc2;Ywhah;Ywhag;Ppp2r2b;Ywhaz;Ywhae;Prkcz	15	450	148	6625	0.0765659
ko00400	Phenylalanine, tyrosine and tryptophan biosynthesis	Got2;Got1	2	450	7	6625	0.0769787
ko04744	Phototransduction	Rgs9;Calm2;Calm1;Calm2.1	4	450	25	6625	0.0855559
ko04922	Glucagon signaling pathway	Ldhb;Pdhb;Calm2;Camk2b;Pdha1;Pgam1;Calm1;Camk2g;Ppp3cb;Calm2.1	10	450	91	6625	0.0880378
ko04015	Rap1 signaling pathway	LOC100361457;Actg1;LOC100909840;Ngfr;Sipa1l2;Actb;Gnao1;Grin1;Cnr1;Calm2;Rasgrp2;Fgf9;Calm1;Hras;Kras;Fgf10;Calm2.1;Tln2;Prkcz	19	450	201	6625	0.0881525
ko05418	Fluid shear stress and atherosclerosis	LOC100361457;Actg1;Hsp90ab1;Actb;Mef2a;Mgst3;Calm2;Gsto1;Acvr2a;Hsp90aa1;Calm1;Calm2.1;Prkcz;Mapk10	14	450	140	6625	0.0925447
ko00270	Cysteine and methionine metabolism	Ldhb;Bcat1;Mdh2;Got2;Got1;Mdh1	6	450	48	6625	0.104335
ko04970	Salivary secretion	Atp2b2;Atp1b1;Calm2;Atp2b1;Calm1;Vamp2;Atp1a3;Calm2.1	8	450	71	6625	0.106871
ko04971	Gastric acid secretion	Actb;Atp1b1;Calm2;Camk2b;Calm1;Atp1a3;Camk2g;Calm2.1	8	450	71	6625	0.106871
ko05410	Hypertrophic cardiomyopathy (HCM)	Cacnb4;LOC100361457;Actg1;Actb;Cacna2d1;Cacng2;Atp2a2;Cacna2d3;Cacnb3	9	450	83	6625	0.108781
ko04022	cGMP-PKG signaling pathway	Vdac3;Slc25a4;Atp2b2;Atp1b1;Mef2a;Calm2;Atp2a2;Atp2b1;Calm1;Vdac1;Atp1a3;Ppp3cb;Vdac2;Calm2.1;Slc25a5	15	450	157	6625	0.112227
ko04010	MAPK signaling pathway	Cacnb4;Pak1;Stmn1;Ngfr;Cacna2d1;Hspa8;Mapk8ip2;Rasgrp2;Fgf9;Cacng2;Ntrk2;Ptprr;Mapk8ip1;Mapt;Dusp8;Cacna2d3;Cacnb3;Hras;Kras;Ppp3cb;Cacna1h;Fgf10;Rps6ka3;Ptpn5;Mapk10	25	450	287	6625	0.117082
ko04137	Mitophagy - animal	Usp15;Optn;Gabarapl1;Hras;Kras;Tax1bp1;Mapk10	7	450	61	6625	0.117776
ko04915	Estrogen signaling pathway	Gabbr1;Hsp90ab1;Gabbr2;Gnao1;Hspa8;Calm2;Fkbp4;Hsp90aa1;Calm1;Hras;Kras;Calm2.1	12	450	121	6625	0.118643
ko05214	Glioma	Calm2;Camk2b;Camk4;Calm1;Hras;Kras;Camk2g;Calm2.1	8	450	73	6625	0.120415
ko05230	Central carbon metabolism in cancer	Pdhb;Pfkm;Pdha1;Pgam1;Hras;Kras;Ntrk3	7	450	62	6625	0.125498
ko04120	Ubiquitin mediated proteolysis	Birc6;Ddb1;Skp1;Ube2ql1;Rnf7;Cul3;Ube2s;Ubr5;Trim37;Herc1;Ube2d1;Ube2m;Uba1	13	450	135	6625	0.126935
ko04012	ErbB signaling pathway	Pak1;Nrg1;Gsk3b;Pak3;Camk2b;Hras;Kras;Camk2g;Mapk10	9	450	86	6625	0.127916
ko04144	Endocytosis	Rab10;Agap3;Iqsec3;Dnm1;Cltb;Kif5a;Hspa8;Smap2;Asap1;Rabep1;Cltc;Ap2m1;Epn3;Dnm3;Tfrc;Agap1;Kif5c;Psd;Hras;Dnajc6;Prkcz;Tsg101	22	450	251	6625	0.129006
ko04742	Taste transduction	Scn9a;Gabbr1;Gabbr2;P2rx3;Scn2a;Scn3a	6	450	51	6625	0.129721
ko00360	Phenylalanine metabolism	Aldh1a3;Got2;Got1	3	450	19	6625	0.13452
ko05414	Dilated cardiomyopathy (DCM)	Cacnb4;LOC100361457;Actg1;Actb;Cacna2d1;Cacng2;Atp2a2;Cacna2d3;Cacnb3	9	450	87	6625	0.134668
ko04919	Thyroid hormone signaling pathway	LOC100361457;Actg1;Actb;Rcan2;Atp1b1;Gsk3b;Atp2a2;Hras;Kras;Atp1a3;Rcan1	11	450	112	6625	0.137726
ko04066	HIF-1 signaling pathway	Pgk1;LOC108351137.1;Pdhb;Camk2b;Tfrc;Pdha1;LOC108351137;Aldoa;Eno1;Camk2g	10	450	100	6625	0.139961
ko00750	Vitamin B6 metabolism	Pnpo;Pdxp	2	450	10	6625	0.144355
ko00280	Valine, leucine and isoleucine degradation	Oxct1;Bcat1;Hmgcs1;Auh;Dld;Acat1	6	450	53	6625	0.148141
ko00640	Propanoate metabolism	Ldhb;Acss2;Dld;Acat1	4	450	31	6625	0.155846
ko04210	Apoptosis	LOC100361457;Capn2;Actg1;Actb;Tuba1b;LOC100363502;Sptan1;Tuba1a;Tuba4a;Hras;Kras;Mapk10	12	450	128	6625	0.158874
ko04911	Insulin secretion	Rab3a;Rims2;Atp1b1;Camk2b;Pclo;Vamp2;Atp1a3;Camk2g	8	450	79	6625	0.166103
ko04024	cAMP signaling pathway	Gabbr1;Pak1;Gabbr2;Atp2b2;Grin1;Atp1b1;Gria2;Calm2;Camk2b;Camk4;Atp2a2;Atp2b1;Calm1;Atp1a3;Camk2g;Calm2.1;Mapk10	17	450	194	6625	0.166751
ko04964	Proximal tubule bicarbonate reclamation	Atp1b1;Atp1a3;Mdh1	3	450	21	6625	0.167519
ko04130	SNARE interactions in vesicular transport	Vamp1;Stx1b;Stx7;Vamp2	4	450	32	6625	0.1692
ko05225	Hepatocellular carcinoma	LOC100361457;Actg1;Actb;Smarcd3;Actl6b;Mgst3;Apc;Smarcd1;Gsk3b;Apc2;Gsto1;Smarca4;Txnrd1;Hras;Kras	15	450	169	6625	0.172907
ko04215	Apoptosis - multiple species	Birc6;Ngfr;LOC100363502;Mapk10	4	450	33	6625	0.182939
ko04916	Melanogenesis	Gnao1;Calm2;Gsk3b;Camk2b;Calm1;Hras;Kras;Camk2g;Calm2.1	9	450	94	6625	0.186827
ko04530	Tight junction	LOC100361457;Ppp2r1a;Actg1;Actr2;Actb;Tuba1b;Hspa4;Myh10;Runx1;Tuba1a;Ppp2r2b;Tuba4a;Prkcz;Mapk10	14	450	159	6625	0.191029
ko04725	Cholinergic synapse	Gng3;Gnao1;Kcnq3;Camk2b;Gng2;Ache;Camk4;Hras;Kras;Camk2g	10	450	109	6625	0.204676
ko04217	Necroptosis	Vdac3;Capn2;Hsp90ab1;Dnm1l;Slc25a4;Fth1;Camk2b;Hsp90aa1;Vdac1;Camk2g;Vdac2;Slc25a5;Mapk10	13	450	149	6625	0.211291
ko04727	GABAergic synapse	Gabbr1;Gng3;Gabbr2;Gnao1;Nsf;Gng2;Slc38a1;Gabarapl1	8	450	87	6625	0.237241
ko00650	Butanoate metabolism	Oxct1;Hmgcs1;Acat1	3	450	25	6625	0.239108
ko04724	Glutamatergic synapse	Slc17a6;Gng3;Gnao1;Slc17a7;Grin1;Gria2;Homer2;Gng2;Slc38a1;Ppp3cb	10	450	114	6625	0.245256
ko00290	Valine, leucine and isoleucine biosynthesis	Bcat1	1	450	4	6625	0.245298
ko00061	Fatty acid biosynthesis	Acsl6;Acsl4	2	450	14	6625	0.24535
ko05170	Human immunodeficiency virus 1 infection	Pak1;Ddb1;Gng3;Skp1;Cfl2;Rnf7;Gnao1;Calm2;Pak3;LOC100363502;Gng2;Calm1;Hras;Kras;Ppp3cb;Calm2.1;Mapk10	17	450	209	6625	0.252787
ko05033	Nicotine addiction	Slc17a6;Slc17a7;Grin1;Gria2	4	450	38	6625	0.25623
ko05134	Legionellosis	Hspd1;Hspa8;Eef1a2;Vcp;LOC100363502	5	450	51	6625	0.263662
ko05160	Hepatitis C	Ywhaq;Ppp2r1a;Gsk3b;Ywhab;LOC100363502;Ywhah;Ywhag;Ppp2r2b;Ywhaz;Hras;Kras;Ywhae	12	450	143	6625	0.264332
ko04912	GnRH signaling pathway	Calm2;Camk2b;Calm1;Hras;Kras;Camk2g;Calm2.1;Mapk10	8	450	90	6625	0.266297
ko05152	Tuberculosis	Atp6ap1;Hspd1;Hspa9;Calm2;Camk2b;LOC100363502;Atp6v0c;Calm1;Atp6v0a1;Camk2g;Ppp3cb;Calm2.1;Mapk10	13	450	157	6625	0.268256
ko04371	Apelin signaling pathway	Gng3;Mef2a;Calm2;Gng2;Camk4;Gabarapl1;Calm1;Hras;Kras;Calm2.1;Spp1	11	450	134	6625	0.301029
ko04810	Regulation of actin cytoskeleton	LOC100361457;Wasf1;Actg1;Pak1;LOC100909840;Cfl2;Actb;Apc;Myh10;Apc2;Fgf9;Pak3;Cyfip2;Hras;Kras;Fgf10	16	450	205	6625	0.317527
ko00450	Selenocompound metabolism	Sephs2;Txnrd1	2	450	17	6625	0.322874
ko04978	Mineral absorption	Atp1b1;Fth1;Atp2b1;Atp1a3	4	450	43	6625	0.334178
ko01040	Biosynthesis of unsaturated fatty acids	Elovl4;Tecr;Acot7	3	450	31	6625	0.352836
ko00062	Fatty acid elongation	Elovl4;Tecr;Acot7	3	450	31	6625	0.352836
ko05167	Kaposi sarcoma-associated herpesvirus infection	Gng3;Calm2;Gsk3b;LOC100363502;Gng2;Gabarapl1;Calm1;Hras;Kras;Ppp3cb;Calm2.1;Atg3;Mapk10;Rcan1	14	450	182	6625	0.353588
ko04750	Inflammatory mediator regulation of TRP channels	Calm2;Camk2b;Calm1;Asic3;Camk2g;Asic1;Calm2.1;Mapk10	8	450	99	6625	0.358391
ko05213	Endometrial cancer	Apc;Gsk3b;Apc2;Hras;Kras	5	450	58	6625	0.35875
ko04910	Insulin signaling pathway	Prkar2b;Calm2;Gsk3b;Ptprf;Calm1;Hras;Kras;Calm2.1;Prkcz;Mapk10	10	450	128	6625	0.3704
ko00220	Arginine biosynthesis	Got2;Got1	2	450	19	6625	0.37352
ko00100	Steroid biosynthesis	Fdft1;Sqle	2	450	19	6625	0.37352
ko05210	Colorectal cancer	Apc;Gsk3b;Apc2;LOC100363502;Hras;Kras;Mapk10	7	450	87	6625	0.378389
ko04730	Long-term depression	Ppp2r1a;Gnao1;Gria2;Hras;Kras	5	450	60	6625	0.386358
ko00051	Fructose and mannose metabolism	Aldoc;Pfkm;Aldoa	3	450	34	6625	0.409467
ko04625	C-type lectin receptor signaling pathway	Pak1;Calm2;Calm1;Hras;Kras;Ppp3cb;Calm2.1;Mapk10	8	450	104	6625	0.411118
ko04979	Cholesterol metabolism	Vdac3;Vdac1;Vdac2;Vapa	4	450	48	6625	0.413034
ko00350	Tyrosine metabolism	Aldh1a3;Got2;Got1	3	450	35	6625	0.428033
ko00330	Arginine and proline metabolism	Ckmt1;Ckb;Got2;Got1	4	450	49	6625	0.428631
ko05034	Alcoholism	Gng3;Gnao1;Grin1;Calm2;Ntrk2;Gng2;Hist3h2ba;Camk4;Calm1;Hras;Kras;Calm2.1	12	450	163	6625	0.42955
ko00430	Taurine and hypotaurine metabolism	Ggt7	1	450	8	6625	0.430525
ko04150	mTOR signaling pathway	Atp6v1b2;Atp6v1d;Gsk3b;Atp6v1f;Atp6v1a;Atp6v1e1;Hras;Kras;Cab39;Rps6ka3;Atp6v1g2	11	450	150	6625	0.44152
ko04070	Phosphatidylinositol signaling system	Mtmr6;Pi4ka;Calm2;Mtmr7;Calm1;Synj1;Calm2.1	7	450	93	6625	0.446508
ko04014	Ras signaling pathway	Pak1;Gng3;Ngfr;Grin1;Calm2;Rasgrp2;Fgf9;Pak3;Ntrk2;Gng2;Calm1;Hras;Kras;Fgf10;Calm2.1;Mapk10	16	450	224	6625	0.45494
ko04218	Cellular senescence	Vdac3;Capn2;Slc25a4;Calm2;Calm1;Hras;Kras;Vdac1;Ppp3cb;Vdac2;Calm2.1;Slc25a5	12	450	167	6625	0.463497
ko05133	Pertussis	Cfl2;Calm2;Calm1;Calm2.1;Mapk10	5	450	66	6625	0.468293
ko00920	Sulfur metabolism	Bpnt1	1	450	9	6625	0.469253
ko04146	Peroxisome	Acsl6;Pex5l;Prdx5;Pmvk;Acsl4;Sod1	6	450	81	6625	0.474889
ko05216	Thyroid cancer	Tpr;Hras;Kras	3	450	38	6625	0.482356
ko04960	Aldosterone-regulated sodium reabsorption	Atp1b1;Kras;Atp1a3	3	450	38	6625	0.482356
ko00500	Starch and sucrose metabolism	Pgm2l1;Gpi	2	450	24	6625	0.492181
ko04740	Olfactory transduction	Calm2;Camk2b;Calm1;Camk2g;Calm2.1;Ncald	6	450	83	6625	0.498949
ko04152	AMPK signaling pathway	Rab10;Ppp2r1a;Rab2a;Ppp2r5b;Pfkm;Ppp2r2b;Eef2;Cab39	8	450	115	6625	0.525451
ko04141	Protein processing in endoplasmic reticulum	Capn2;Hsp90ab1;Skp1;Hspa8;Vcp;Hspbp1;Hspa4l;Hsp90aa1;Hsph1;Ube2d1;Mapk10	11	450	160	6625	0.529177
ko05416	Viral myocarditis	LOC100361457;Actg1;Actb;LOC100363502;Eif4g2	5	450	71	6625	0.533879
ko04520	Adherens junction	LOC100361457;Wasf1;Actg1;Actb;Ptprf	5	450	71	6625	0.533879
ko00071	Fatty acid degradation	Acsl6;Acsl4;Acat1	3	450	42	6625	0.550705
ko04310	Wnt signaling pathway	Skp1;Cxxc4;Ctnnbip1;Apc;Gsk3b;Apc2;Camk2b;Camk2g;Ppp3cb;Mapk10	10	450	148	6625	0.55473
ko05161	Hepatitis B	Atp6ap1;Vdac3;Ywhaq;Ddb1;Ywhab;LOC100363502;Ywhaz;Hras;Kras;Mapk10	10	450	148	6625	0.55473
ko04340	Hedgehog signaling pathway	Kif3a;Cul3;Gsk3b	3	450	43	6625	0.566944
ko03020	RNA polymerase	Polr2k;Polr3d	2	450	28	6625	0.576318
ko04213	Longevity regulating pathway - multiple species	Hspa8;Hras;Kras;Sod1	4	450	60	6625	0.589313
ko04621	NOD-like receptor signaling pathway	Vdac3;Hsp90ab1;Dnm1l;Sugt1;Tp53bp1;Gabarapl1;Hsp90aa1;Vdac1;Vdac2;Mapk10	10	450	152	6625	0.589432
ko04136	Autophagy - other	Gabarapl1;Atg3	2	450	29	6625	0.595698
ko05165	Human papillomavirus infection	Atp6ap1;Atp6v1b2;Ppp2r1a;Atp6v1d;Apc;Gsk3b;Ppp2r5b;Apc2;Atp6v1f;Atp6v1a;Atp6v1e1;Atp6v0c;Ppp2r2b;Hes6;Hras;Atp6v0a1;Kras;Psmc1;Prkcz;Atp6v1g2;Spp1	21	450	322	6625	0.611908
ko04110	Cell cycle	Ywhaq;Skp1;Gsk3b;Ywhab;Ywhah;Ywhag;Ywhaz;Ywhae	8	450	124	6625	0.61266
ko04151	PI3K-Akt signaling pathway	Ywhaq;Ppp2r1a;Hsp90ab1;Gng3;Ngfr;Gsk3b;Ppp2r5b;Ywhab;Fgf9;Ywhah;Ntrk2;Gng2;Ywhag;Ppp2r2b;Ywhaz;Hsp90aa1;Hras;Kras;Ywhae;Fgf10;Spp1	21	450	323	6625	0.617744
ko05030	Cocaine addiction	Rgs9;Grin1;Gria2	3	450	47	6625	0.628174
ko00380	Tryptophan metabolism	Dlst;Dld;Acat1	3	450	47	6625	0.628174
ko05020	Prion diseases	Ncam1;Sod1	2	450	31	6625	0.632446
ko04972	Pancreatic secretion	Atp2b2;Atp1b1;Atp2a2;Atp2b1;Atp1a3;Pnlip	6	450	96	6625	0.643322
ko05203	Viral carcinogenesis	Vdac3;Ywhaq;Ddb1;Mrps18b;Ywhab;Ywhah;Ywhag;Hist3h2ba;Ywhaz;Hras;Kras;Psmc1;Ywhae	13	450	206	6625	0.650845
ko00604	Glycosphingolipid biosynthesis - ganglio series	St3gal5	1	450	15	6625	0.652253
ko05221	Acute myeloid leukemia	Runx1t1;Runx1;Hras;Kras	4	450	65	6625	0.653016
ko04660	T cell receptor signaling pathway	Pak1;Gsk3b;Pak3;Hras;Kras;Ppp3cb	6	450	97	6625	0.653349
ko04940	Type I diabetes mellitus	Ica1;Ptprn;Hspd1	3	450	49	6625	0.656466
ko04657	IL-17 signaling pathway	Hsp90ab1;Mapk6;Gsk3b;Hsp90aa1;Mapk10	5	450	82	6625	0.66319
ko05164	Influenza A	LOC100361457;Actg1;Actb;Hspa8;Gsk3b;LOC100363502;Fdps;Vdac1;Mapk10	9	450	146	6625	0.667941
ko00980	Metabolism of xenobiotics by cytochrome P450	Mgst3;Aldh1a3;Gsto1	3	450	50	6625	0.67002
ko00982	Drug metabolism - cytochrome P450	Mgst3;Aldh1a3;Gsto1	3	450	50	6625	0.67002
ko04659	Th17 cell differentiation	Hsp90ab1;Runx1;Hsp90aa1;Ppp3cb;Gata3;Mapk10	6	450	99	6625	0.672878
ko04550	Signaling pathways regulating pluripotency of stem cells	Id4;Apc;Gsk3b;Apc2;Acvr2a;Hras;Kras;Isl1	8	450	131	6625	0.674319
ko00770	Pantothenate and CoA biosynthesis	Bcat1	1	450	16	6625	0.675927
ko04514	Cell adhesion molecules (CAMs)	Alcam;Cdh2;Ncam1;Nrcam;Nrxn2;Ptprf;L1cam;Cadm1;Nrxn1	9	450	148	6625	0.683747
ko05218	Melanoma	Fgf9;Hras;Kras;Fgf10	4	450	68	6625	0.687923
ko05211	Renal cell carcinoma	Pak1;Pak3;Hras;Kras	4	450	68	6625	0.687923
ko00983	Drug metabolism - other enzymes	Impdh1;Mgst3;Gsto1;Nme1	4	450	68	6625	0.687923
ko04973	Carbohydrate digestion and absorption	Atp1b1;Atp1a3	2	450	35	6625	0.698032
ko00250	Alanine, aspartate and glutamate metabolism	Got2;Got1	2	450	35	6625	0.698032
ko04662	B cell receptor signaling pathway	Gsk3b;Hras;Kras;Ppp3cb	4	450	69	6625	0.698992
ko04071	Sphingolipid signaling pathway	Ppp2r1a;Ppp2r5b;Ppp2r2b;Hras;Kras;Prkcz;Mapk10	7	450	118	6625	0.6993
ko03320	PPAR signaling pathway	Acsl6;Fabp5;Acsl4;Fabp3	4	450	70	6625	0.709778
ko04917	Prolactin signaling pathway	Gsk3b;Hras;Kras;Mapk10	4	450	70	6625	0.709778
ko04924	Renin secretion	Calm2;Calm1;Ppp3cb;Calm2.1	4	450	71	6625	0.720279
ko04914	Progesterone-mediated oocyte maturation	Hsp90ab1;Hsp90aa1;Kras;Rps6ka3;Mapk10	5	450	88	6625	0.723043
ko00562	Inositol phosphate metabolism	Mtmr6;Pi4ka;Mtmr7;Synj1	4	450	72	6625	0.730497
ko04612	Antigen processing and presentation	Hsp90ab1;Hspa8;Hspa4;Hsp90aa1	4	450	72	6625	0.730497
ko05219	Bladder cancer	Hras;Kras	2	450	38	6625	0.740617
ko04975	Fat digestion and absorption	Got2;Pnlip	2	450	38	6625	0.740617
ko04350	TGF-beta signaling pathway	Ppp2r1a;Id4;Skp1;Acvr2a;Rgma	5	450	90	6625	0.741214
ko00480	Glutathione metabolism	Ggt7;Mgst3;Gsto1	3	450	56	6625	0.743114
ko04926	Relaxin signaling pathway	Gng3;Gnao1;Gng2;Hras;Kras;Prkcz;Mapk10	7	450	124	6625	0.747246
ko04370	VEGF signaling pathway	Hras;Kras;Ppp3cb	3	450	57	6625	0.753955
ko00040	Pentose and glucuronate interconversions	Akr1a1	1	450	20	6625	0.755594
ko05032	Morphine addiction	Gabbr1;Gng3;Gabbr2;Gnao1;Gng2	5	450	92	6625	0.758496
ko04062	Chemokine signaling pathway	Pak1;Gng3;Gsk3a;Ccl27;Gsk3b;Rasgrp2;Gng2;Hras;Kras;Prkcz	10	450	175	6625	0.760158
ko05204	Chemical carcinogenesis	Mgst3;Aldh1a3;Gsto1	3	450	58	6625	0.764425
ko00310	Lysine degradation	Dlst;Dld;Acat1	3	450	58	6625	0.764425
ko00260	Glycine, serine and threonine metabolism	Pgam1;Dld	2	450	40	6625	0.766072
ko04510	Focal adhesion	LOC100361457;Capn2;Actg1;Pak1;Actb;Gsk3b;Pak3;Hras;Tln2;Spp1;Mapk10	11	450	195	6625	0.781924
ko05215	Prostate cancer	Hsp90ab1;Gsk3b;Hsp90aa1;Hras;Kras	5	450	95	6625	0.782775
ko05217	Basal cell carcinoma	Apc;Gsk3b;Apc2	3	450	60	6625	0.784279
ko00561	Glycerolipid metabolism	Akr1a1;Agpat3;Pnlip	3	450	60	6625	0.784279
ko00340	Histidine metabolism	Aldh1a3	1	450	22	6625	0.787765
ko01521	EGFR tyrosine kinase inhibitor resistance	Nrg1;Gsk3b;Hras;Kras	4	450	79	6625	0.794282
ko04977	Vitamin digestion and absorption	Pnlip	1	450	23	6625	0.802229
ko00515	Mannose type O-glycan biosynthesis	B3gat1	1	450	23	6625	0.802229
ko03018	RNA degradation	Hspd1;Hspa9;Pfkm;Eno1	4	450	80	6625	0.802324
ko04664	Fc epsilon RI signaling pathway	Hras;Kras;Mapk10	3	450	63	6625	0.811451
ko04142	Lysosome	Atp6ap1;Cltb;Cltc;Atp6v0c;Atp6v0a1;Ap3b2	6	450	117	6625	0.815911
ko00565	Ether lipid metabolism	Pafah1b1;Pafah1b3	2	450	45	6625	0.8204
ko04930	Type II diabetes mellitus	Prkcz;Mapk10	2	450	45	6625	0.8204
ko05223	Non-small cell lung cancer	Eml4;Hras;Kras	3	450	65	6625	0.827915
ko00520	Amino sugar and nucleotide sugar metabolism	Gpi;Cmas	2	450	46	6625	0.829807
ko05224	Breast cancer	Apc;Gsk3b;Apc2;Fgf9;Hras;Kras;Fgf10	7	450	138	6625	0.837367
ko04931	Insulin resistance	Gsk3b;Ptprf;Rps6ka3;Prkcz;Mapk10	5	450	103	6625	0.838297
ko04623	Cytosolic DNA-sensing pathway	Polr2k;Polr3d	2	450	47	6625	0.838768
ko04611	Platelet activation	LOC100361457;Actg1;Actb;Rasgrp2;Tln2;Prkcz	6	450	121	6625	0.839896
ko04666	Fc gamma R-mediated phagocytosis	Wasf1;Pak1;Cfl2;Asap1	4	450	86	6625	0.84536
ko05226	Gastric cancer	Apc;Gsk3b;Apc2;Fgf9;Hras;Kras;Fgf10	7	450	140	6625	0.847873
ko04920	Adipocytokine signaling pathway	Acsl6;Acsl4;Mapk10	3	450	68	6625	0.850297
ko00052	Galactose metabolism	Pfkm	1	450	27	6625	0.850893
ko04392	Hippo signaling pathway - multiple species	Pak1	1	450	27	6625	0.850893
ko04068	FoxO signaling pathway	Foxg1;Homer2;Gabarapl1;Hras;Kras;Mapk10	6	450	123	6625	0.85091
ko03015	mRNA surveillance pathway	Ppp2r1a;Ssu72;Ppp2r5b;Ppp2r2b	4	450	88	6625	0.857836
ko00860	Porphyrin and chlorophyll metabolism	Eprs	1	450	28	6625	0.861063
ko05205	Proteoglycans in cancer	LOC100361457;Actg1;Pak1;Actb;Ank3;Ank2;Camk2b;Hras;Kras;Camk2g	10	450	195	6625	0.86261
ko04115	p53 signaling pathway	LOC100363502;Ccng1;Rprm	3	450	70	6625	0.863775
ko04710	Circadian rhythm	Skp1	1	450	29	6625	0.87054
ko00410	beta-Alanine metabolism	Aldh1a3	1	450	30	6625	0.879372
ko04726	Serotonergic synapse	Gng3;Gnao1;Gng2;Hras;Kras	5	450	111	6625	0.881639
ko00240	Pyrimidine metabolism	Nme1;Ctps1	2	450	55	6625	0.89639
ko05231	Choline metabolism in cancer	Wasf1;Hras;Kras;Mapk10	4	450	96	6625	0.899505
ko05166	Human T-cell leukemia virus 1 infection	Vdac3;Slc25a4;Fdps;Hras;Kras;Vdac1;Ppp3cb;Vdac2;Tln2;Slc25a5;Mapk10	11	450	223	6625	0.900673
ko04622	RIG-I-like receptor signaling pathway	Pin1;Mapk10	2	450	56	6625	0.902067
ko01524	Platinum drug resistance	Mgst3;LOC100363502;Gsto1	3	450	77	6625	0.902901
ko05163	Human cytomegalovirus infection	Gng3;Gnao1;Calm2;Gsk3b;LOC100363502;Gng2;Calm1;Hras;Kras;Ppp3cb;Calm2.1	11	450	224	6625	0.903664
ko04512	ECM-receptor interaction	AC126641;Sv2a;Spp1	3	450	78	6625	0.907578
ko05220	Chronic myeloid leukemia	Runx1;Hras;Kras	3	450	78	6625	0.907578
ko05142	Chagas disease (American trypanosomiasis)	Ppp2r1a;Gnao1;Ppp2r2b;Mapk10	4	450	98	6625	0.908078
ko03013	RNA transport	Tpr;Eef1a2;Eif2s3y;Eif3c;Eif4g2;Cyfip2;Eif4a2	7	450	155	6625	0.910306
ko03008	Ribosome biogenesis in eukaryotes	Gnl3l;Fbll1;Nop56	3	450	79	6625	0.912051
ko04933	AGE-RAGE signaling pathway in diabetic complications	Hras;Kras;Prkcz;Mapk10	4	450	99	6625	0.912117
ko05200	Pathways in cancer	Eml4;Hsp90ab1;Gng3;Skp1;Tpr;Runx1t1;Mgst3;Apc;Calm2;Gsk3b;Apc2;Rasgrp2;Fgf9;Camk2b;LOC100363502;Gng2;Gsto1;Runx1;Hsp90aa1;Txnrd1;Calm1;Hras;Kras;Camk2g;Fgf10;Calm2.1;Mapk10	27	450	501	6625	0.921497
ko04658	Th1 and Th2 cell differentiation	Ppp3cb;Gata3;Mapk10	3	450	83	6625	0.92804
ko04140	Autophagy - animal	Gabarapl1;Hras;Kras;Atg3;Mapk10	5	450	125	6625	0.933842
ko04211	Longevity regulating pathway	Camk4;Hras;Kras	3	450	85	6625	0.934994
ko05145	Toxoplasmosis	Gnao1;Hspa8;LOC100363502;Mapk10	4	450	107	6625	0.939132
ko04650	Natural killer cell mediated cytotoxicity	Pak1;Hras;Kras;Ppp3cb	4	450	107	6625	0.939132
ko00230	Purine metabolism	Impdh1;Prps1;Gmpr;Guk1;Nme1	5	450	129	6625	0.944389
ko03022	Basal transcription factors	Atp5f1c	1	450	41	6625	0.944594
ko04934	Cushing syndrome	Apc;Gsk3b;Apc2;Camk2b;Camk2g;Cacna1h	6	450	149	6625	0.945498
ko04976	Bile secretion	Atp1b1;Atp1a3	2	450	68	6625	0.950957
ko05202	Transcriptional misregulation in cancer	Ngfr;Mlf1;Six1;Runx1t1;Cdk14;Runx1;Pbx3	7	450	171	6625	0.951354
ko04918	Thyroid hormone synthesis	Atp1b1;Atp1a3	2	450	70	6625	0.956403
ko03420	Nucleotide excision repair	Ddb1	1	450	45	6625	0.958261
ko00600	Sphingolipid metabolism	Ugcg	1	450	45	6625	0.958261
ko01522	Endocrine resistance	Hras;Kras;Mapk10	3	450	94	6625	0.959253
ko05206	MicroRNAs in cancer	Stmn1;Apc;Apc2;Ccng1;Hras;Kras	6	450	156	6625	0.959354
ko05212	Pancreatic cancer	Kras;Mapk10	2	450	74	6625	0.965611
ko04928	Parathyroid hormone synthesis, secretion and action	Mef2a;Gata3;Mafb	3	450	99	6625	0.968764
ko00510	N-Glycan biosynthesis	Alg2	1	450	50	6625	0.970713
ko05169	Epstein-Barr virus infection	Psmc6;Psmd2;LOC100363502;Psmd1;Psmc5;Psmc1;Psmd12;Mapk10	8	450	204	6625	0.971905
ko05162	Measles	Hspa8;Gsk3b;LOC100363502;Mapk10	4	450	125	6625	0.974539
ko04072	Phospholipase D signaling pathway	Dnm1;Dnm3;Hras;Kras;Agpat3	5	450	147	6625	0.975441
ko04270	Vascular smooth muscle contraction	Ppp1r14a;Calm2;Calm1;Calm2.1	4	450	126	6625	0.975782
ko04640	Hematopoietic cell lineage	Cd24;Tfrc	2	450	82	6625	0.978743
ko05150	Staphylococcus aureus infection	Masp1	1	450	56	6625	0.980864
ko04620	Toll-like receptor signaling pathway	Spp1;Mapk10	2	450	84	6625	0.981176
ko04974	Protein digestion and absorption	Atp1b1;Atp1a3	2	450	85	6625	0.982289
ko04670	Leukocyte transendothelial migration	LOC100361457;Actg1;Actb	3	450	110	6625	0.982834
ko00590	Arachidonic acid metabolism	Prxl2b	1	450	60	6625	0.985594
ko04927	Cortisol synthesis and secretion	Cacna1h	1	450	61	6625	0.986581
ko04380	Osteoclast differentiation	Camk4;Ppp3cb;Mapk10	3	450	117	6625	0.988376
ko00564	Glycerophospholipid metabolism	Ache;Agpat3	2	450	95	6625	0.990427
ko04610	Complement and coagulation cascades	Masp1	1	450	71	6625	0.993407
ko04668	TNF signaling pathway	Dnm1l;Mapk10	2	450	104	6625	0.994543
ko04064	NF-kappa B signaling pathway	Erc1	1	450	85	6625	0.997567
ko05222	Small cell lung cancer	LOC100363502	1	450	90	6625	0.998297
ko03040	Spliceosome	Cwc15;Hspa8	2	450	131	6625	0.999027
ko05322	Systemic lupus erythematosus	Hist3h2ba	1	450	109	6625	0.999562
ko03010	Ribosome	Mrpl12;Mrps15	2	450	155	6625	0.999797
ko04080	Neuroactive ligand-receptor interaction	Gabbr1;Gabbr2;Grin1;Gria2;Cnr1;P2rx3;Pyy	7	450	290	6625	0.999824
ko04630	Jak-STAT signaling pathway	Hras	1	450	133	6625	0.999922
ko04060	Cytokine-cytokine receptor interaction	Ngfr;Ccl27;Acvr2a	3	450	233	6625	0.99999
ko05168	Herpes simplex virus 1 infection	LOC100363502	1	450	306	6625	1
